# Supplementary material for: Psychosocial Impact of COVID-19 Pandemic in Libya: A Cross-Sectional Study
Source: PubMed Central journal article supplement (PMC8416112; doi:10.3389/fpsyg.2021.714749), 2021-08-17
Supplement: Table_1.pdf [file Table_1.pdf]

**Model Coefficients – The Perceived Stress**

| <b>Predictor</b>                   | <b>Estimate</b>  | <b>SE</b> | <b>t</b> | <b>p</b> |
|------------------------------------|------------------|-----------|----------|----------|
| <b>Intercept</b>                   | 16.83            | 1.63      | 10.32    | < .001   |
| <b>Age:</b>                        |                  |           |          |          |
| 18-29                              | <b>REFERENCE</b> |           |          |          |
| 30-39                              | -0.68            | 1.25      | -0.54    | 0.59     |
| 40-49                              | 0.03             | 1.54      | 0.02     | 0.98     |
| 50-59                              | -2.24            | 1.93      | -1.16    | 0.25     |
| 60+                                | -5.35            | 4.27      | -1.25    | 0.21     |
| <b>Gender:</b>                     |                  |           |          |          |
| Male                               | <b>REFERENCE</b> |           |          |          |
| Female                             | 3.46             | 0.64      | 5.42     | < .001   |
| <b>Marital status:</b>             |                  |           |          |          |
| Single                             | <b>REFERENCE</b> |           |          |          |
| Married                            | -1.99            | 1.07      | -1.86    | 0.06     |
| Divorced                           | -1.16            | 3.57      | -0.32    | 0.75     |
| Widow                              | -1.23            | 5.58      | -0.22    | 0.83     |
| <b>Education:</b>                  |                  |           |          |          |
| Primary                            | <b>REFERENCE</b> |           |          |          |
| Secondary                          | 0.44             | 1.59      | 0.28     | 0.78     |
| Bachelor                           | -0.26            | 1.64      | -0.16    | 0.87     |
| Master                             | -0.46            | 2.16      | -0.21    | 0.83     |
| Doctor or more                     | -1.59            | 2.30      | -0.69    | 0.49     |
| Vocational training                | 0.57             | 3.27      | 0.17     | 0.86     |
| No formal education                | -2.16            | 3.45      | -0.63    | 0.53     |
| <b>Occupation:</b>                 |                  |           |          |          |
| Student                            | <b>REFERENCE</b> |           |          |          |
| Public sector employee             | 1.07             | 1.18      | 0.91     | 0.36     |
| Private sector employee            | -1.17            | 1.02      | -1.15    | 0.25     |
| Not working, unemployed, housewife | 1.94             | 1.30      | 1.50     | 0.14     |
| Retired                            | 3.32             | 3.97      | 0.84     | 0.40     |

**Model Coefficients – Sleep Quality**

| <b>Predictor</b> | <b>Estimate</b>  | <b>SE</b> | <b>t</b> | <b>p</b> |
|------------------|------------------|-----------|----------|----------|
| <b>Intercept</b> | 57.71            | 2.30      | 25.05    | < .001   |
| <b>Age:</b>      |                  |           |          |          |
| 18-29            | <b>REFERENCE</b> |           |          |          |
| 30-39            | -0.03            | 1.77      | -0.02    | 0.99     |
| 40-49            | -4.58            | 2.18      | -2.10    | 0.04     |
| 50-59            | -2.69            | 2.72      | -0.99    | 0.32     |

|                                    |                  |      |       |      |
|------------------------------------|------------------|------|-------|------|
| 60+                                | -5.96            | 6.03 | -0.99 | 0.32 |
| <b>Gender:</b>                     |                  |      |       |      |
| Male                               | <b>REFERENCE</b> |      |       |      |
| Female                             | 0.80             | 0.90 | 0.89  | 0.37 |
| <b>Marital status:</b>             |                  |      |       |      |
| Single                             | <b>REFERENCE</b> |      |       |      |
| Married                            | -2.77            | 1.51 | -1.84 | 0.07 |
| Divorced                           | -1.69            | 5.04 | -0.34 | 0.74 |
| Widow                              | 7.00             | 7.88 | 0.89  | 0.38 |
| <b>Education:</b>                  |                  |      |       |      |
| Primary                            | <b>REFERENCE</b> |      |       |      |
| Secondary                          | -1.61            | 2.25 | -0.72 | 0.47 |
| Bachelor                           | -2.58            | 2.31 | -1.12 | 0.27 |
| Master                             | -1.97            | 3.05 | -0.64 | 0.52 |
| Doctor or more                     | -5.76            | 3.25 | -1.77 | 0.08 |
| Vocational training                | 4.09             | 4.62 | 0.88  | 0.38 |
| No formal education                | -6.65            | 4.87 | -1.37 | 0.17 |
| <b>Occupation:</b>                 |                  |      |       |      |
| Student                            | <b>REFERENCE</b> |      |       |      |
| Public sector employee             | -0.29            | 1.66 | -0.17 | 0.86 |
| Private sector employee            | -0.24            | 1.44 | -0.16 | 0.87 |
| Not working, unemployed, housewife | 2.55             | 1.83 | 1.39  | 0.16 |
| Retired                            | -0.59            | 5.61 | -0.11 | 0.92 |

#### Model Coefficients - Depression

| Predictor              | Estimate         | SE   | t     | p      |
|------------------------|------------------|------|-------|--------|
| <b>Intercept</b>       | 21.83            | 1.76 | 12.42 | < .001 |
| <b>Age:</b>            |                  |      |       |        |
| 18-29                  | <b>REFERENCE</b> |      |       |        |
| 30-39                  | 0.14             | 1.35 | 0.10  | 0.92   |
| 40-49                  | -0.52            | 1.66 | -0.31 | 0.75   |
| 50-59                  | -2.11            | 2.07 | -1.02 | 0.31   |
| 60+                    | -2.59            | 4.60 | -0.56 | 0.57   |
| <b>Gender:</b>         |                  |      |       |        |
| Male                   | <b>REFERENCE</b> |      |       |        |
| Female                 | 2.04             | 0.69 | 2.97  | 0.00   |
| <b>Marital status:</b> |                  |      |       |        |
| Single                 | <b>REFERENCE</b> |      |       |        |
| Married                | -4.47            | 1.15 | -3.89 | < .001 |
| Divorced               | 1.87             | 3.85 | 0.49  | 0.63   |

|                                           |                  |           |          |          |
|-------------------------------------------|------------------|-----------|----------|----------|
| Widow                                     | 1.71             | 6.02      | 0.28     | 0.78     |
| <b>Education:</b>                         |                  |           |          |          |
| Primary                                   | <b>REFERENCE</b> |           |          |          |
| Secondary                                 | -1.37            | 1.71      | -0.80    | 0.43     |
| Bachelor                                  | -2.55            | 1.76      | -1.45    | 0.15     |
| Master                                    | -4.06            | 2.33      | -1.74    | 0.08     |
| Doctor or more                            | -4.16            | 2.48      | -1.68    | 0.09     |
| Vocational training                       | -4.76            | 3.53      | -1.35    | 0.18     |
| No formal education                       | -2.52            | 3.72      | -0.68    | 0.50     |
| <b>Occupation:</b>                        |                  |           |          |          |
| Student                                   | <b>REFERENCE</b> |           |          |          |
| Public sector employee                    | 1.42             | 1.27      | 1.12     | 0.26     |
| Private sector employee                   | 0.47             | 1.10      | 0.43     | 0.67     |
| Not working, unemployed, housewife        | 2.51             | 1.40      | 1.80     | 0.07     |
| Retired                                   | 3.04             | 4.28      | 0.71     | 0.48     |
| <b>Model Coefficients – Self-efficacy</b> |                  |           |          |          |
| <b>Predictor</b>                          | <b>Estimate</b>  | <b>SE</b> | <b>t</b> | <b>p</b> |
| <b>Intercept</b>                          | 6.86             | 0.40      | 17.32    | < .001   |
| <b>Gender:</b>                            |                  |           |          |          |
| Male                                      | <b>REFERENCE</b> |           |          |          |
| Female                                    | -0.53            | 0.16      | -3.45    | < .001   |
| <b>Monthly income:</b>                    |                  |           |          |          |
| Less than 500                             | <b>REFERENCE</b> |           |          |          |
| 500 to 1000                               | -0.31            | 0.40      | -0.76    | 0.45     |
| 1000 to 2000                              | -0.14            | 0.40      | -0.34    | 0.73     |
| 2000 to 5000                              | -0.06            | 0.42      | -0.14    | 0.89     |
| more than 5000                            | 0.61             | 0.46      | 1.31     | 0.19     |
